# Supplementary material for: Influence of the copper precursor on the catalytic transformation of oleylamine during Cu nanoparticle synthesis
Source: Royal Society of Chemistry journal article supplement (doi:10.1039/d1cy00639h), 2021-01-01
Supplement: d1cy00639h1.pdf [file d1cy00639h1.pdf]

## Supplementary information

# Influence of Copper Precursor on the Catalytic Transformation of Oleylamine during Cu Nanoparticles Synthesis

*Antoine Pesesse,<sup>1</sup> Sophie Carencó<sup>1,\*</sup>*

<sup>1</sup> Sorbonne Université, CNRS, Collège de France, Laboratoire de Chimie de la Matière Condensée de Paris, 4 place Jussieu, 75005 Paris, France

E-mail: [sophie.carenco@sorbonne-universite.fr](mailto:sophie.carenco@sorbonne-universite.fr)

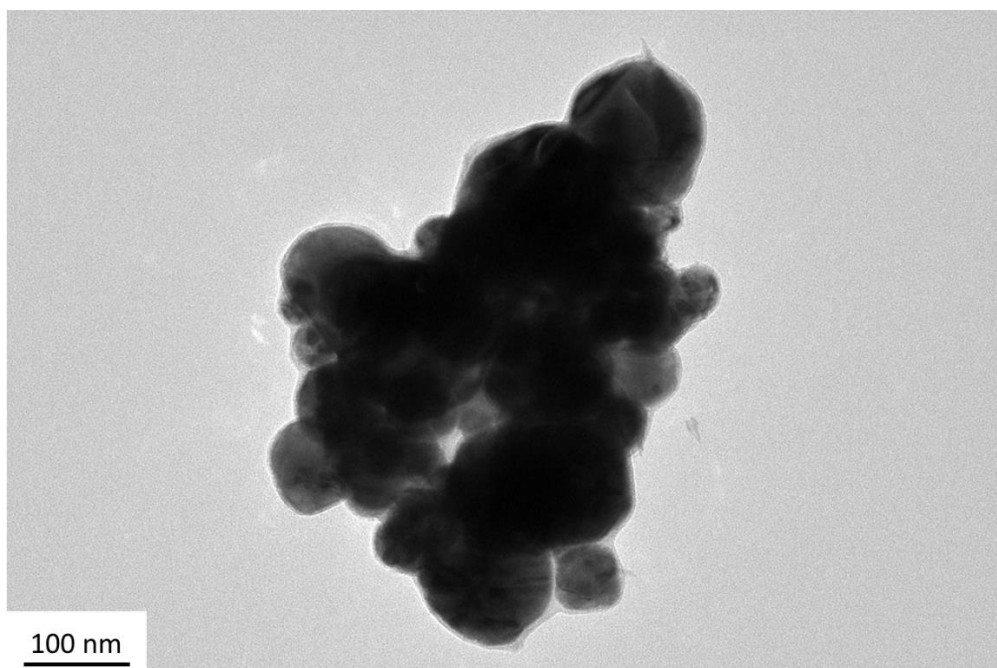

Figure S1: TEM micrograph of **Cu\_A** nanoparticles before washing steps.

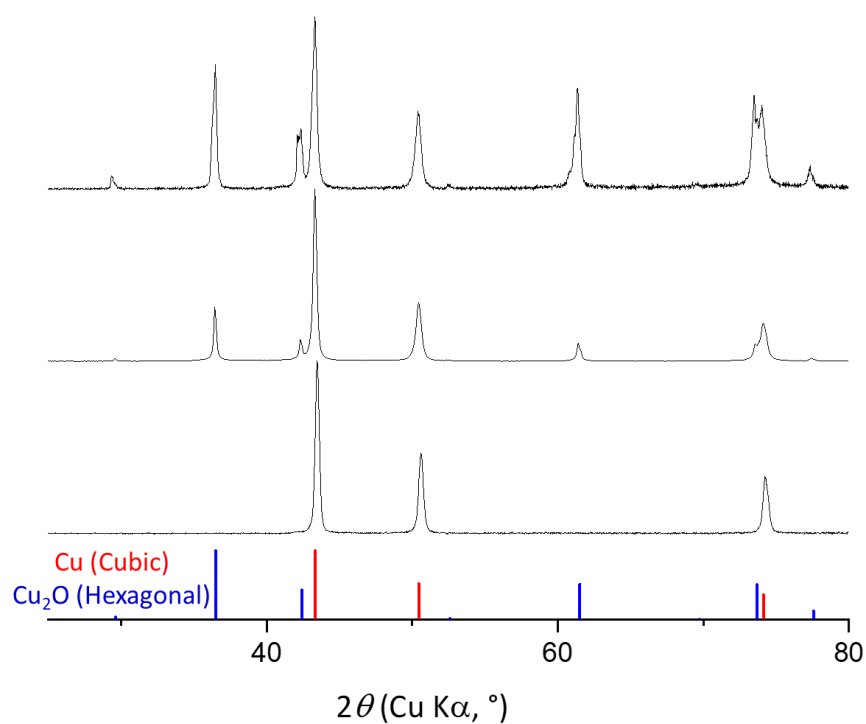

Figure S2: XRD patterns of several samples of copper nanoparticles **Cu\_A** synthesized with  $\text{Cu}(\text{OAc})_2$  as precursor. XRD reference pattern for cubic Cu in red (COD number: 9008468) and for cubic  $\text{Cu}_2\text{O}$  in blue (COD number: 1010941) (bottom).

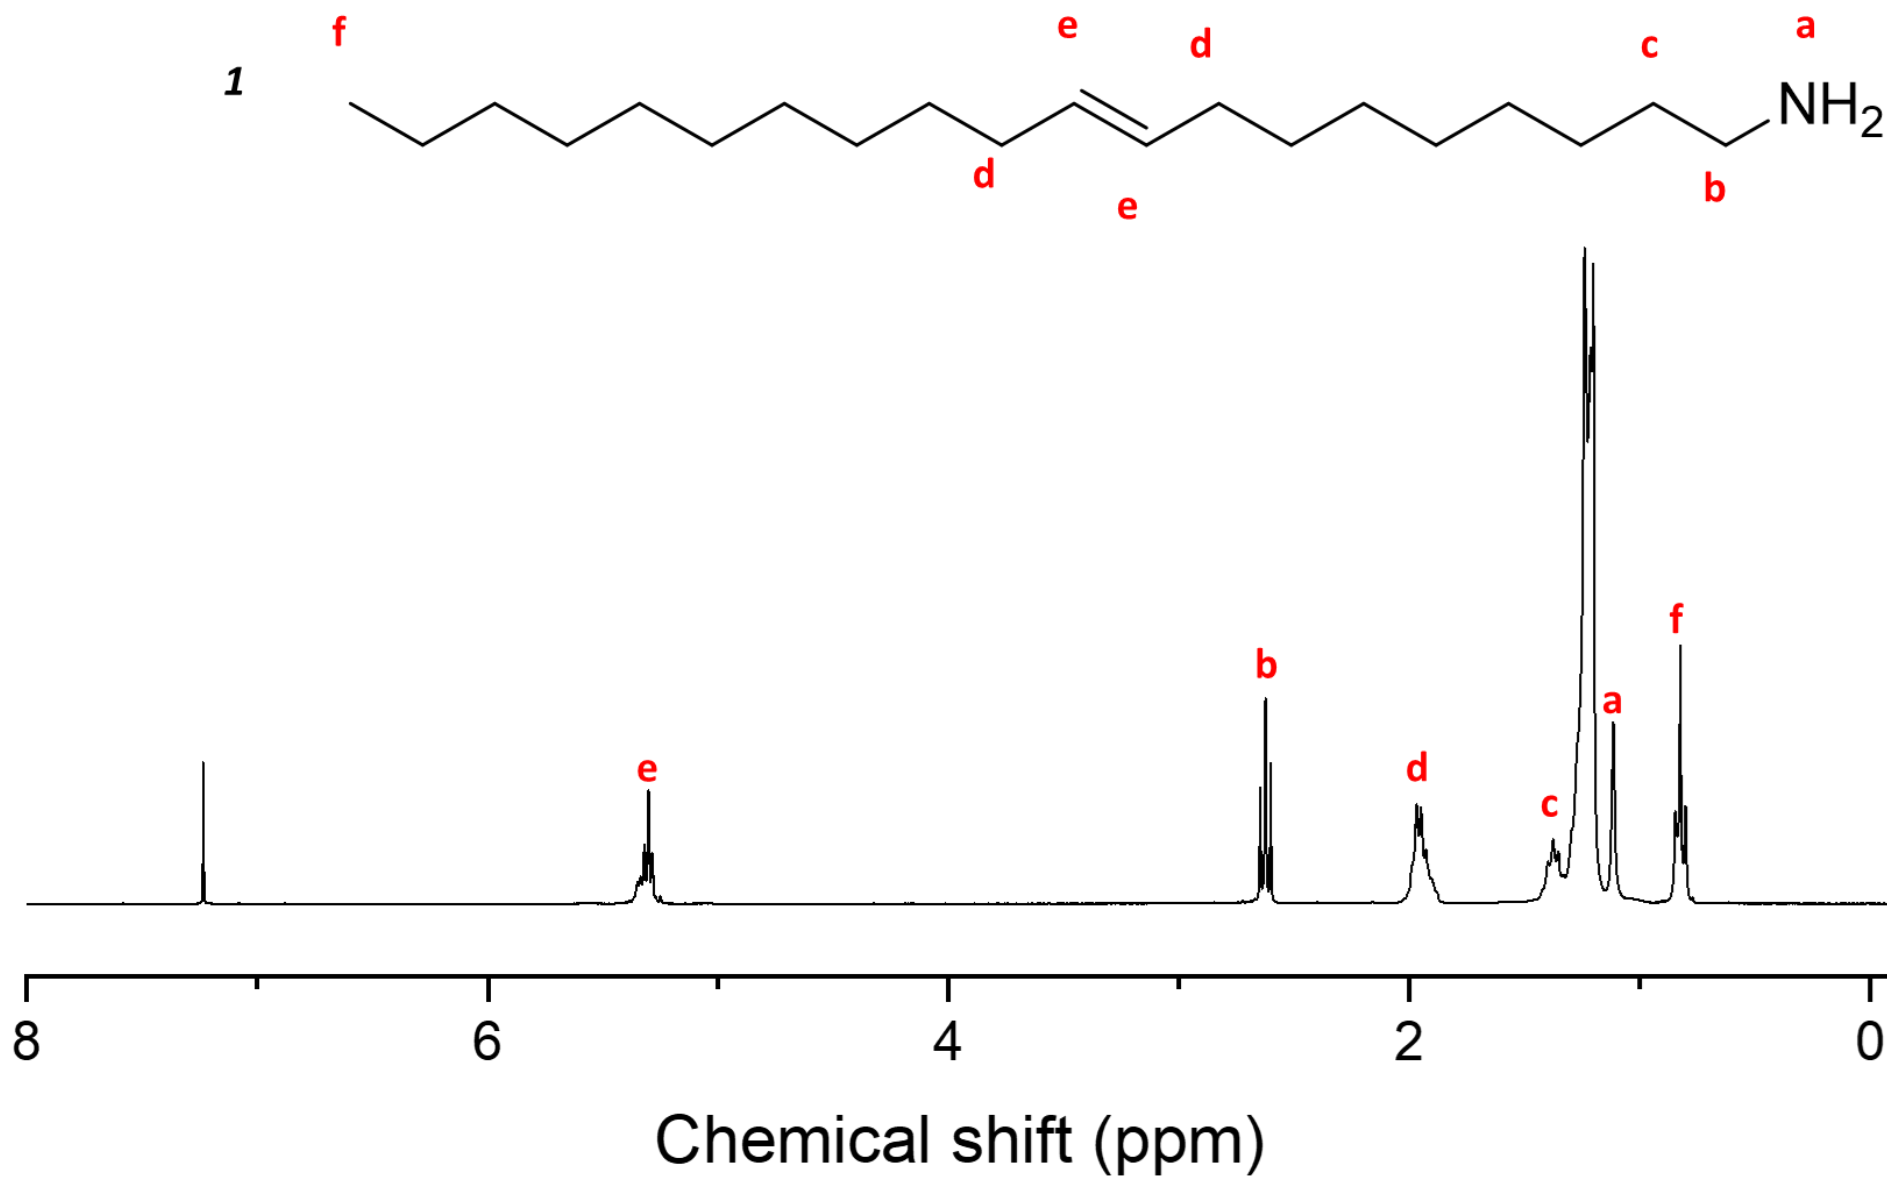

Figure S3: (Top) Molecular structure of oleylamine, (bottom)  $^1\text{H}$  NMR spectrum of commercial oleylamine.

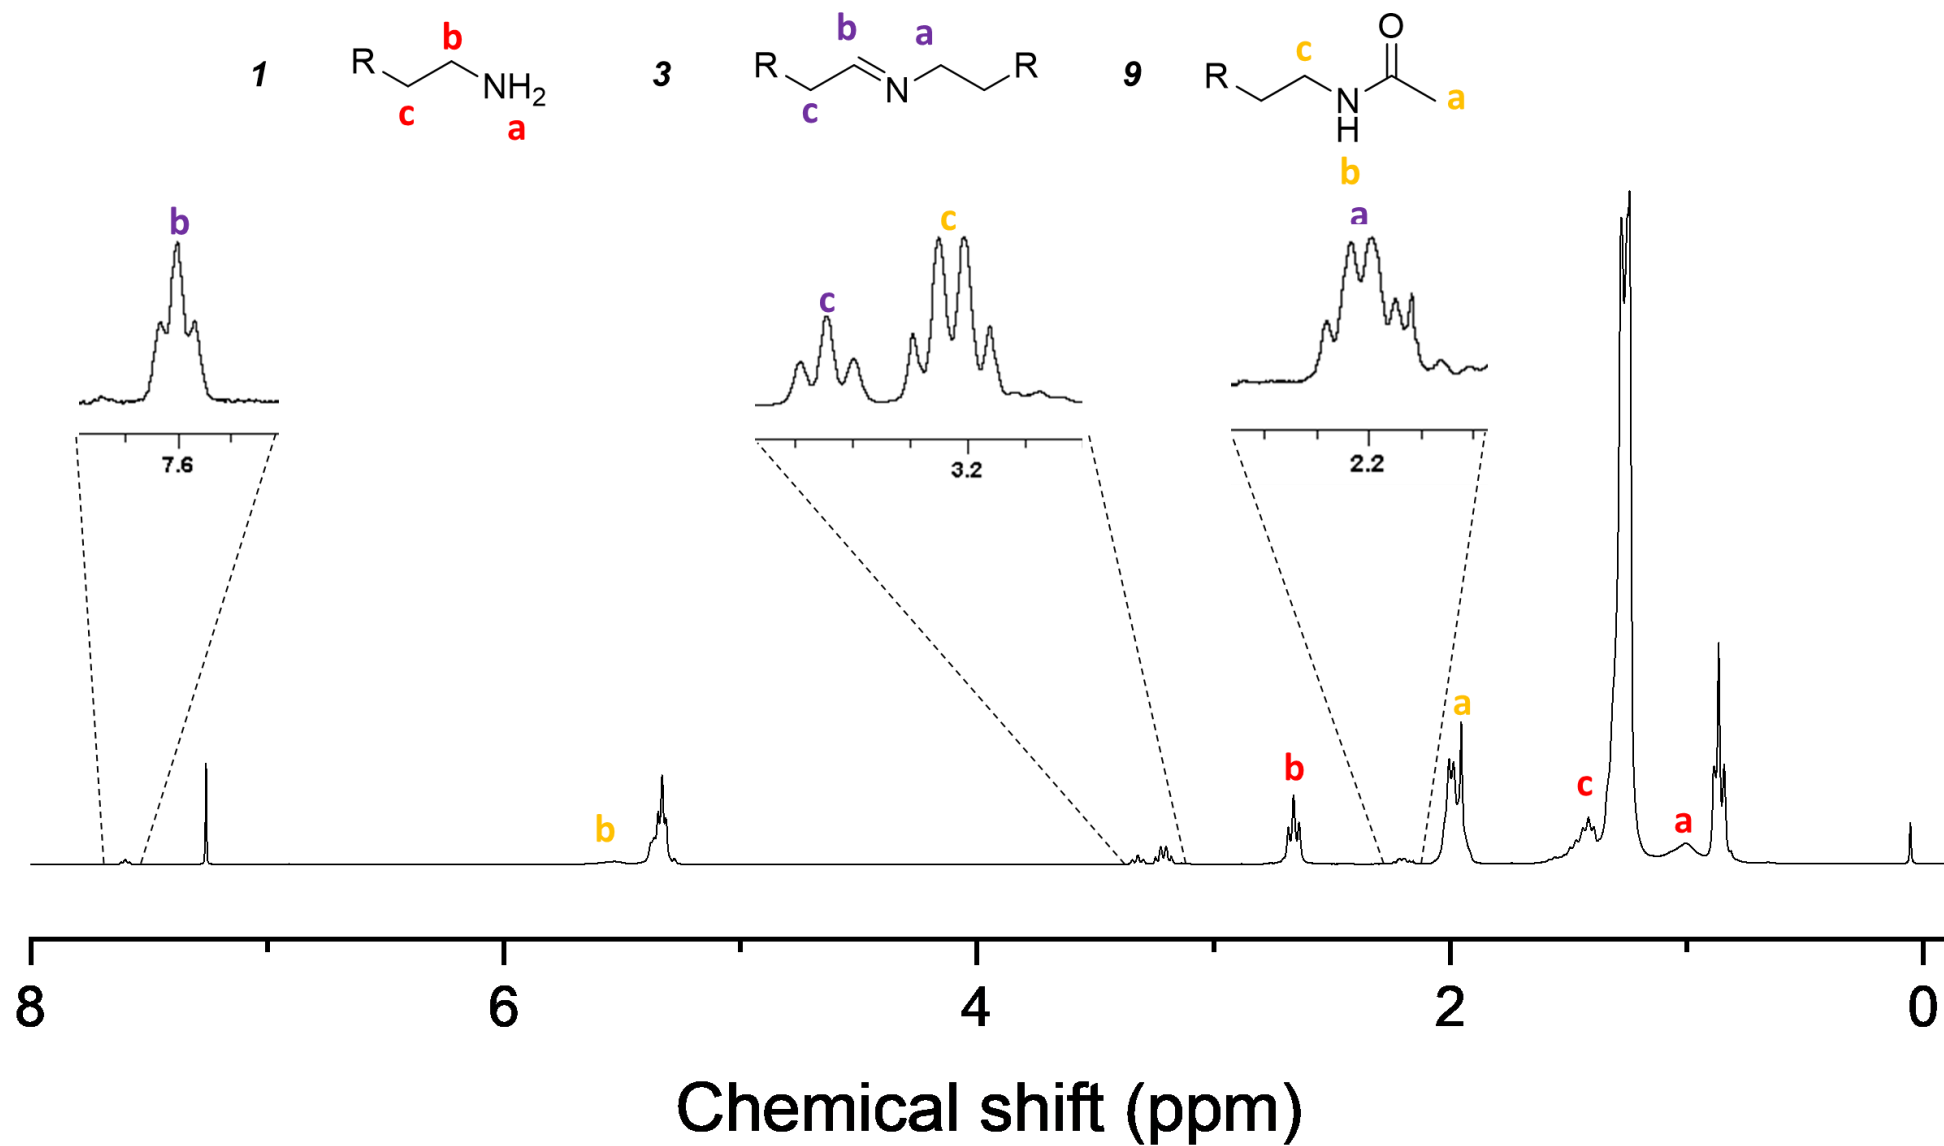

Figure S4: (Top) Molecular structure of species detected in the  $^1\text{H}$  NMR spectrum. (Bottom)  $^1\text{H}$  NMR spectrum of the supernatant of synthesis **A** centrifuged at 9000 RPM during 15 min.

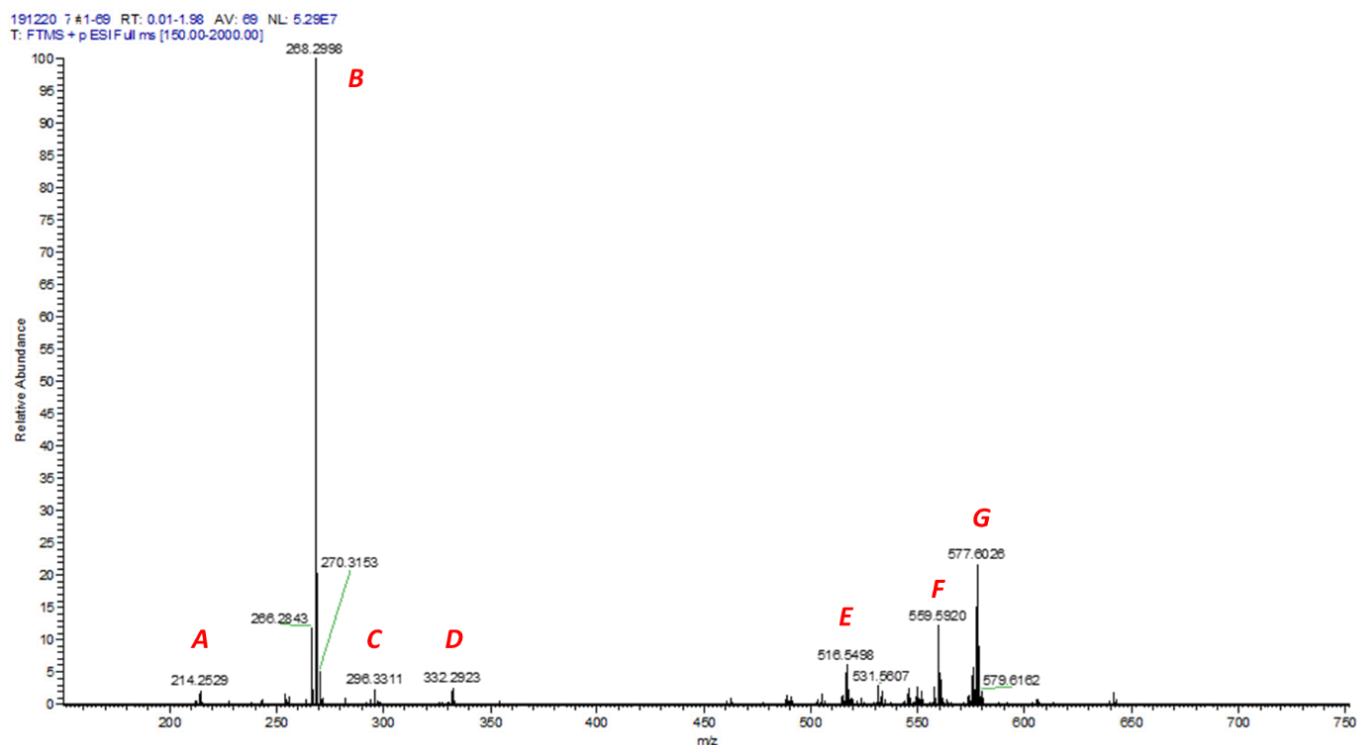

Figure S5: ESI-MS of the supernatant of synthesis **A** centrifuged at 9000 RPM during 15 min. Peaks interpreted are marked with a red letter and their interpretation are given in Table S1.

| Entry | Measured Mass | Proposed chemical formula | Corresponding theoretical mass | Proposed ionized structure |
|-------|---------------|---------------------------|--------------------------------|----------------------------|
| A     | 214.2529      | $C_{14}H_{32}N + H^+$     | 214.2534                       |                            |
| B     | 268.2998      | $C_{18}H_{38}N + H^+$     | 268.3004                       |                            |
| C     | 296.3311      | $C_{20}H_{42}N + H^+$     | 296.3317                       |                            |
| D     | 332.2923      | $C_{20}H_{39}NO + Na^+$   | 332.2929                       |                            |
| E     | 516.5498      | $C_{36}H_{70}N + H^+$     | 516.5508                       |                            |
| F     | 559.5920      | $C_{38}H_{75}N_2 + H^+$   | 559.5930                       |                            |
| G     | 577.6026      | $C_{38}H_{75}N_2 + H_2O$  | 577.6035                       |                            |

Table S1: Ionized structure interpreted from mass spectrogram S6.

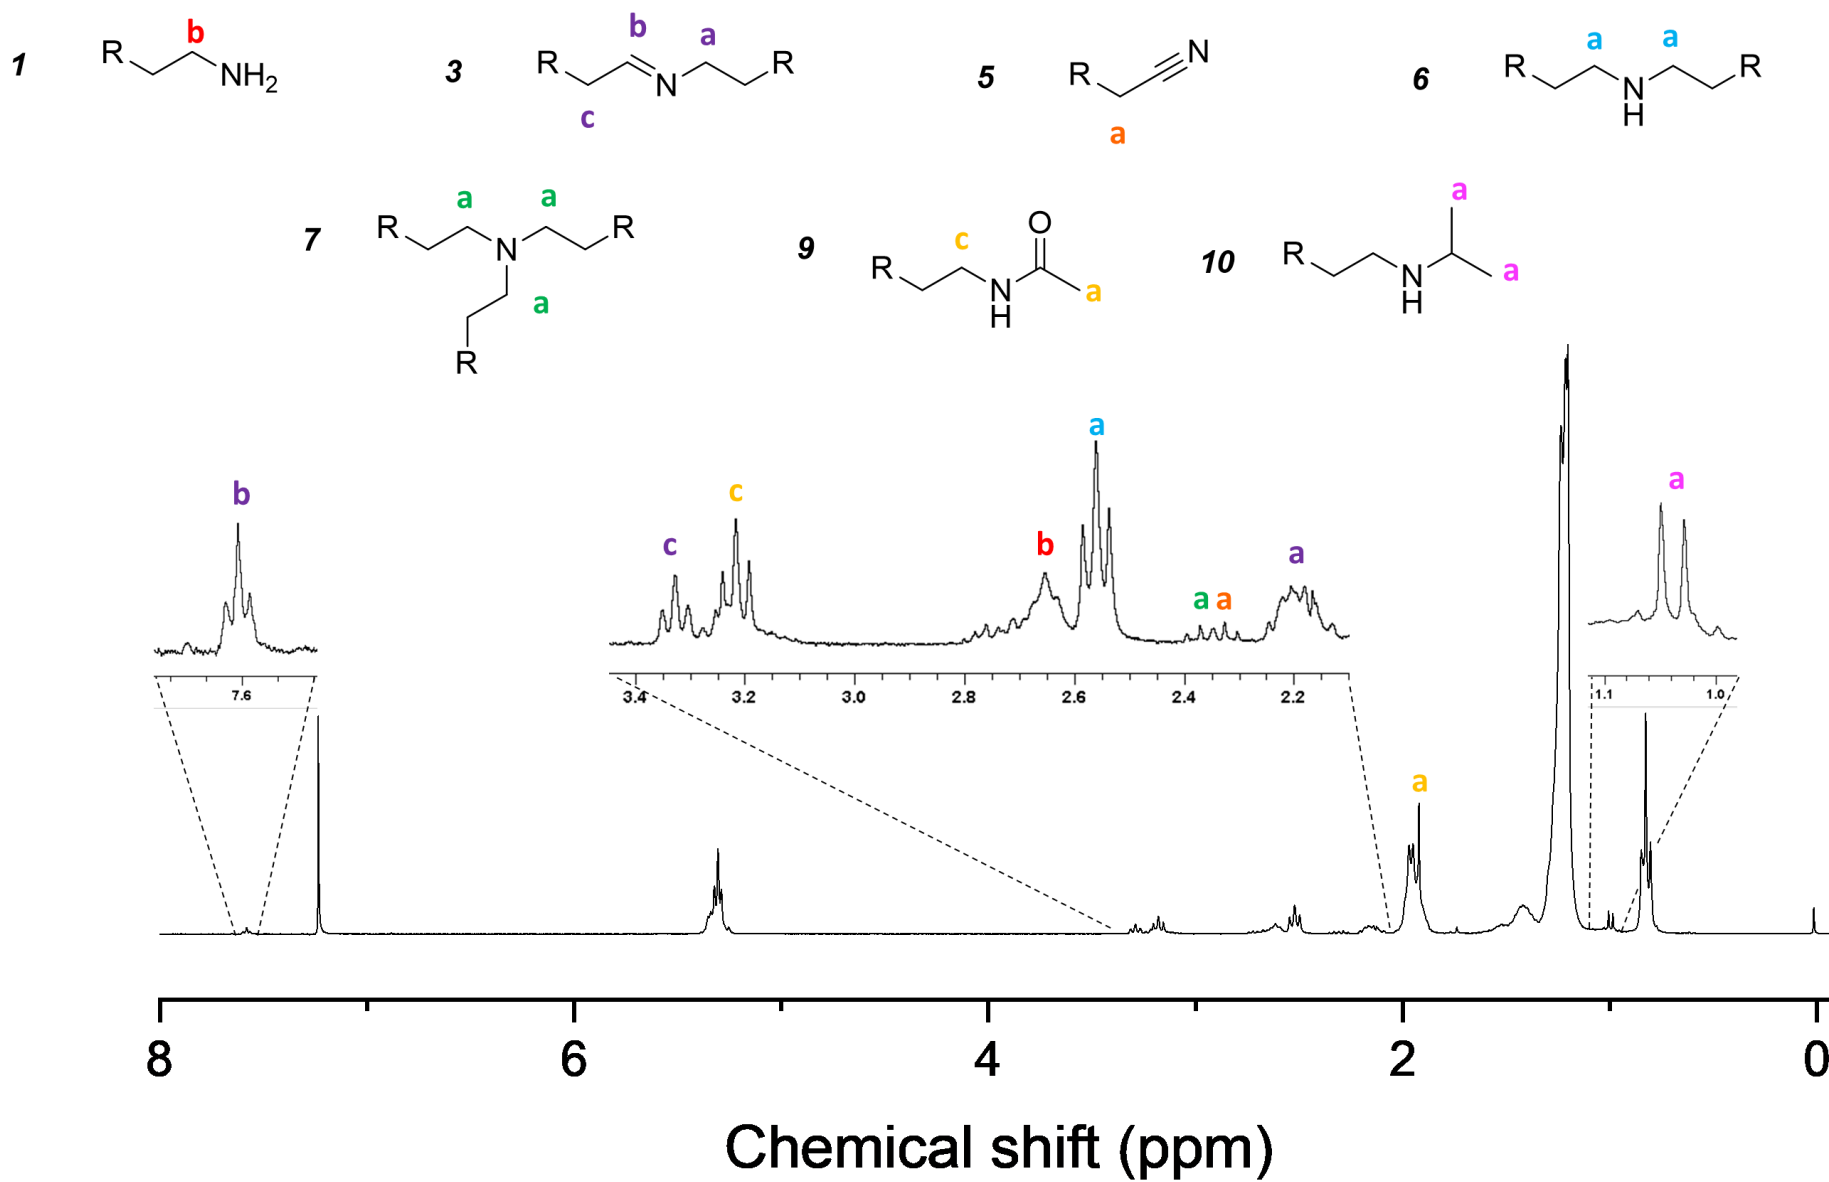

Figure S6: (Top) Molecular structure of species detected in the  $^1\text{H}$  NMR spectrum. (Bottom)  $^1\text{H}$  NMR spectrum of the supernatant of synthesis **B** centrifuged at 9000 RPM during 15 min.

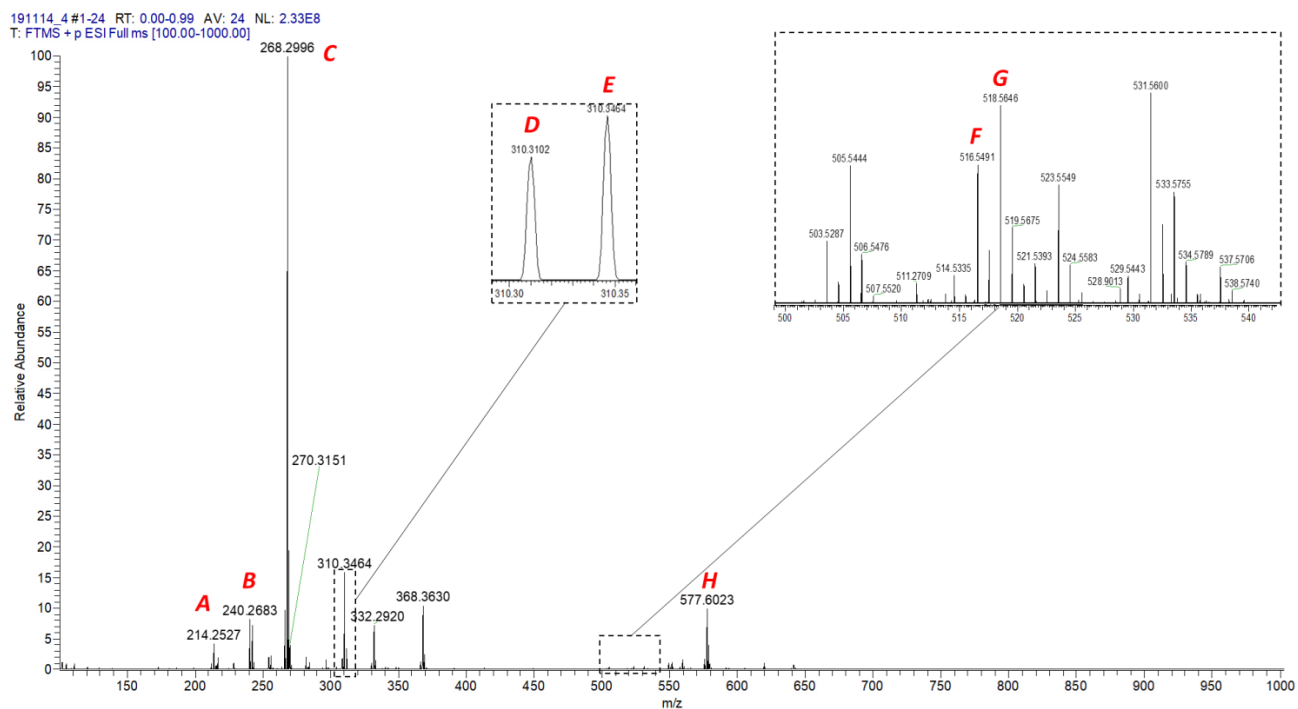

Figure S7: ESI-MS of the supernatant of synthesis **B** centrifuged at 9000 RPM during 15 min. Peaks interpreted are marked with a red letter and their interpretation are given in Table S2.

| Entry | Measured Mass | Proposed chemical formula     | Corresponding theoretical mass | Proposed ionized structure                                      |
|-------|---------------|-------------------------------|--------------------------------|-----------------------------------------------------------------|
| A     | 214.2529      | $C_{14}H_{31}N + H^+$         | 214.2534                       | <chem>CCCCCCCCCCCCCNH2</chem> + $H^+$                           |
| B     | 240.2683      | $C_{16}H_{33}N + H^+$         | 240.2691                       | <chem>CCCCCCCC=CCCCCCCCCNH2</chem> + $H^+$                      |
| C     | 268.2998      | $C_{18}H_{37}N + H^+$         | 268.3004                       | <chem>CCCCCCCC=CCCCCCCC=CCCCCNH2</chem> + $H^+$                 |
| D     | 310.3102      | $C_{20}H_{39}ON + H^+$        | 310.3104                       | <chem>CCCCCCCC=CCCCCCCC=CCCCCN(C)C=O</chem> + $H^+$             |
| E     | 310.3464      | $C_{21}H_{43}N + H^+$         | 310.3468                       | <chem>CCCCCCCC=CCCCCCCC=CCCCCN(C)C</chem> + $H^+$               |
| F     | 332.2923      | $C_{20}H_{39}NO + Na^+$       | 332.2929                       | <chem>CCCCCCCC=CCCCCCCC=CCCCCN(C)C=O</chem> + $H^+$             |
| G     | 368.363       | $C_{23}H_{43}ON + H_2O + H^+$ | 368.3529                       | <chem>CCCCCCCC=CCCCCCCC=CCCCCN=CCCCCCCC=CCCCCCCC</chem> + $H^+$ |
| H     | 516.5491      | $C_{36}H_{69}N + H^+$         | 516.5508                       | <chem>CCCCCCCC=CCCCCCCC=CCCCCNCCCCCCCC=CCCCCCCC</chem> + $H^+$  |
| I     | 518.5646      | $C_{36}H_{71}N + H^+$         | 518.5659                       | <chem>CCCCCCCC=CCCCCCCC=CCCCCN(C)C=O</chem> + $H^+$             |
| J     | 577.6023      | $C_{38}H_{75}N + H_2O + H^+$  | 577.6035                       | <chem>CCCCCCCC=CCCCCCCC=CCCCCN(C)C=O</chem> + $H_2O + H^+$      |

Table S2: Ionized structure interpreted from mass spectrogram S6.

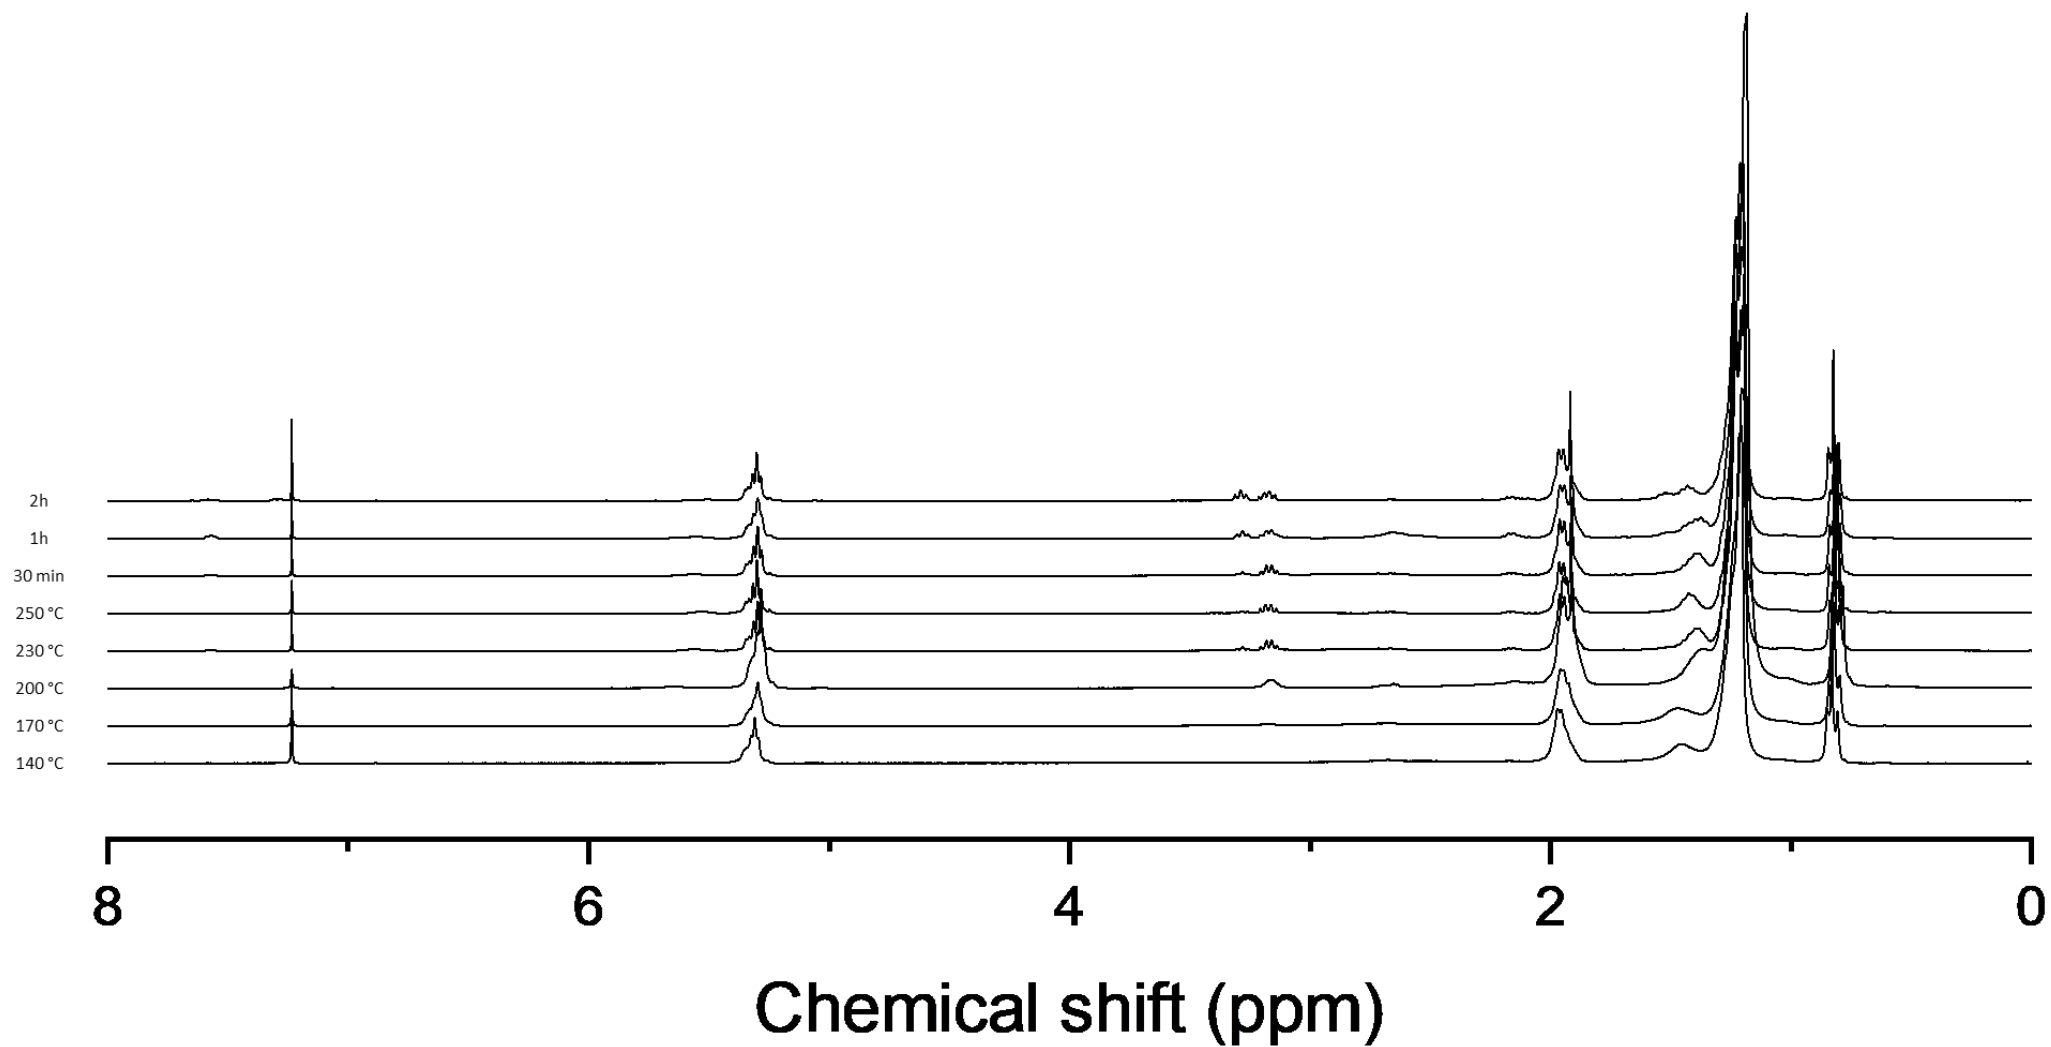

Figure S8a : <sup>1</sup>H NMR spectra from synthesis **A** *in situ* study. From bottom to top are displayed spectrum made from samples taken at 140 °C, 170 °C, 200 °C, 230 °C, 250 °C and after 30 min, 1h and 2h of plateau.



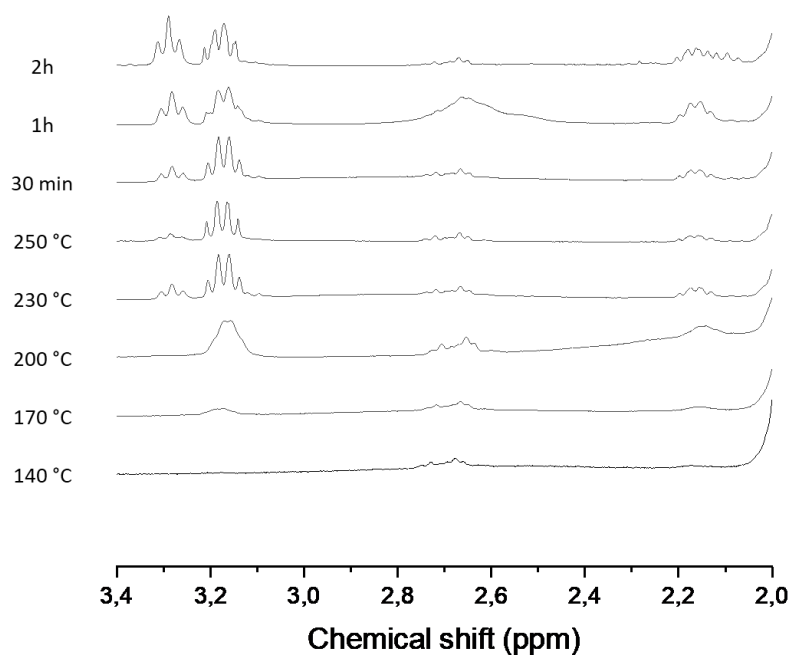

Figure S8b: Zoom in of  $^1\text{H}$  NMR spectra in the  $\text{CH}_2$  region from synthesis **A** *in situ* study. From bottom to top are displayed spectrum made from samples taken at 140 °C, 170 °C, 200 °C, 230 °C, 250 °C and after 30 min, 1h and 2h of plateau.

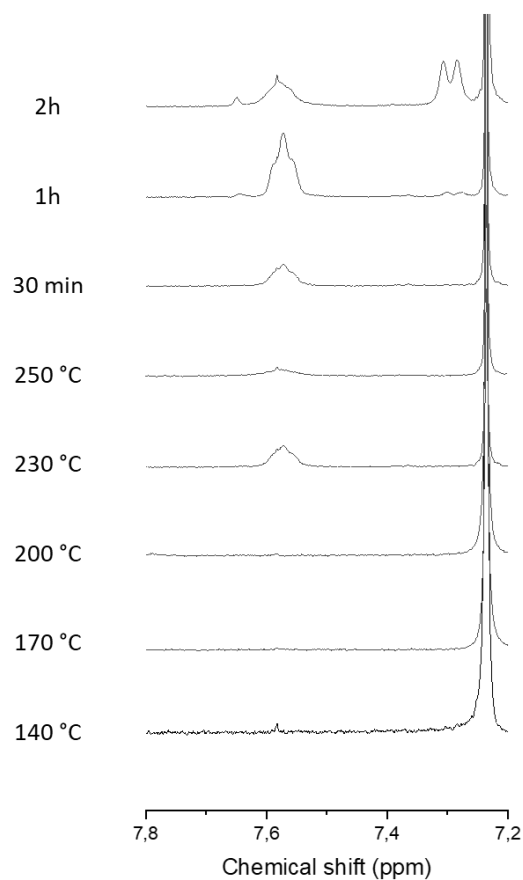

Figure S8c: Zoom in of  $^1\text{H}$  NMR spectra in the H of secondary aldimine region from synthesis **A** *in situ* study. From bottom to top are displayed spectrum made from samples taken at 140 °C, 170 °C, 200 °C, 230 °C, 250 °C and after 30 min, 1h and 2h of plateau.

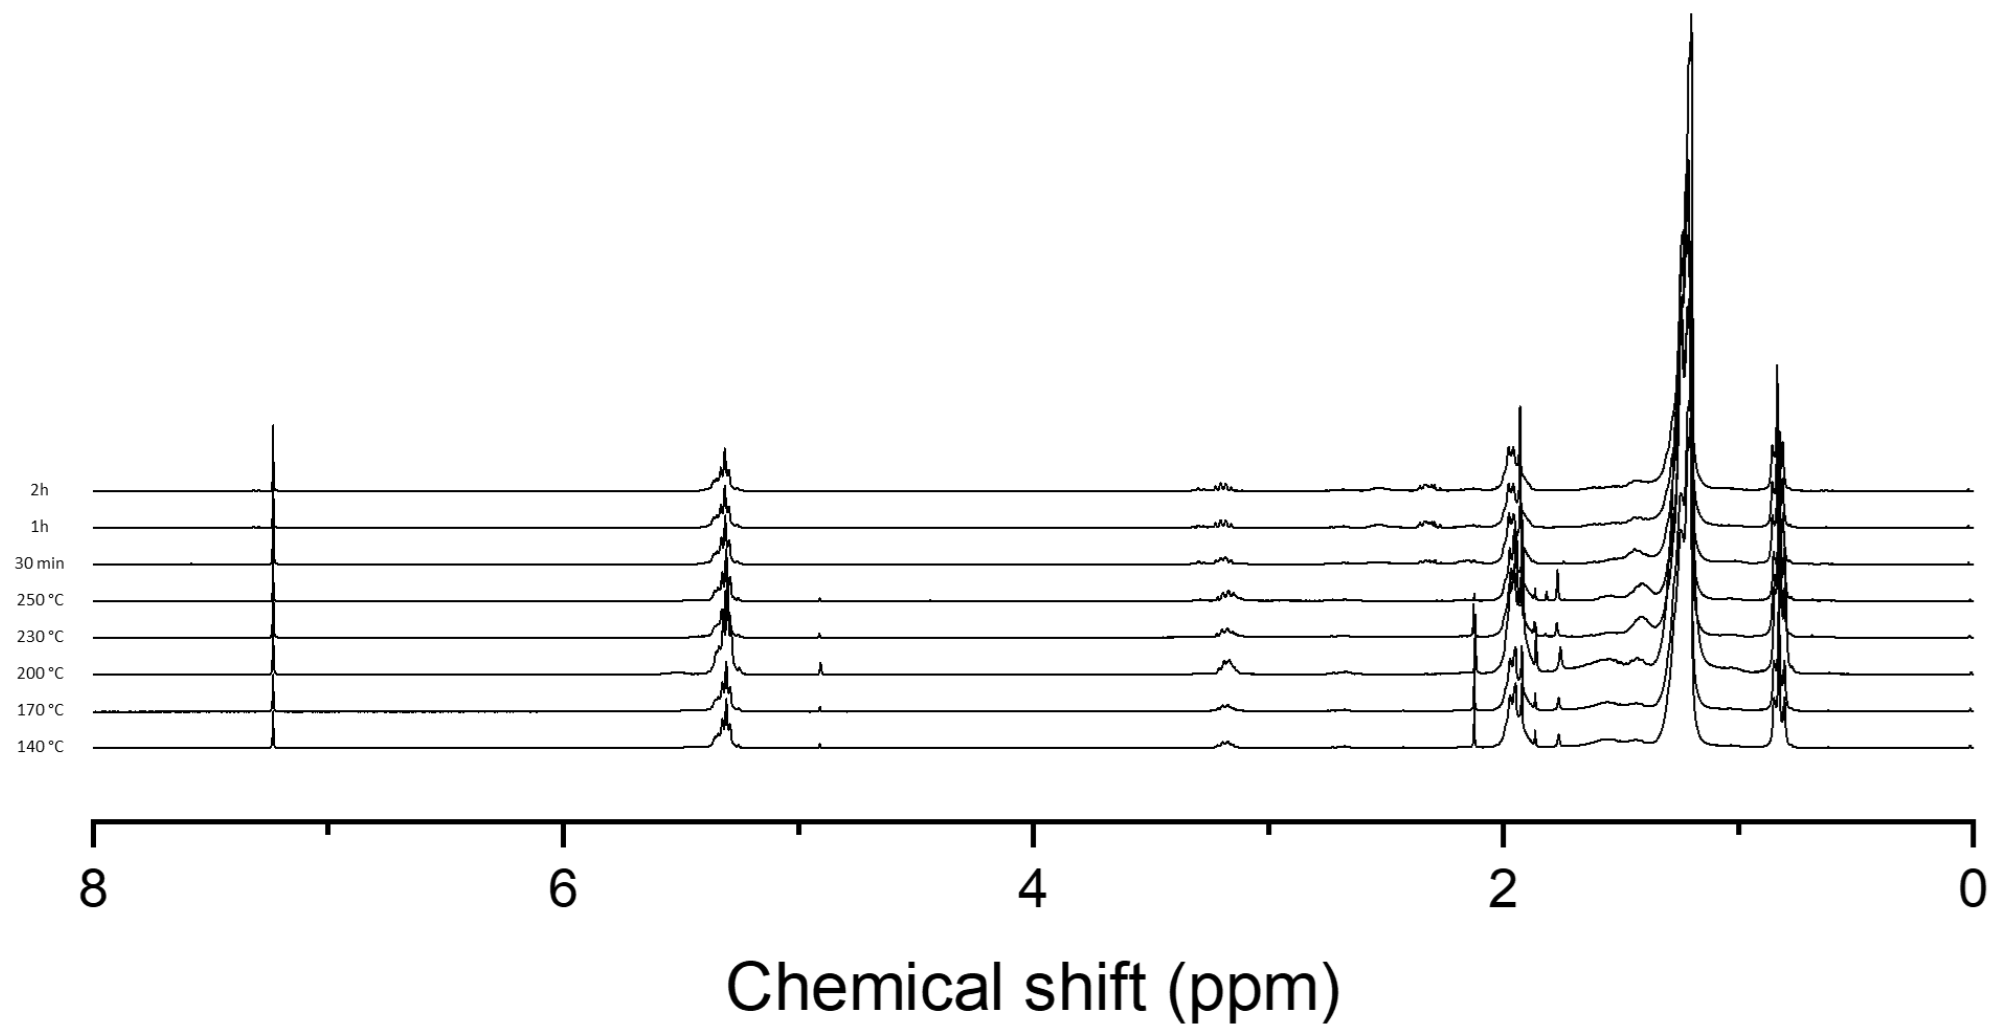

Figure S9a:  $^1\text{H}$  NMR spectra from synthesis **B** *in situ* study. From bottom to top are displayed spectrum made from samples taken at 140 °C, 170 °C, 200 °C, 230 °C, 250 °C and after 30 min, 1 h and 2 h of plateau.

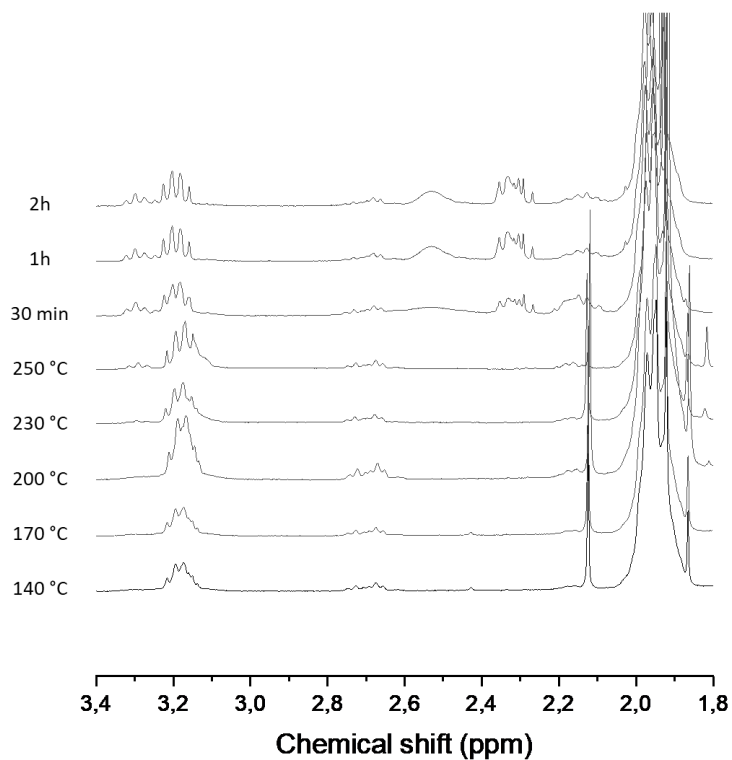

Figure S9b: Zoom of  $^1\text{H}$  NMR spectra in the  $\text{CH}_2$  region from synthesis **B** *in situ* study. From bottom to top are displayed spectrum made from samples taken at 140 °C, 170 °C, 200 °C, 230 °C, 250 °C and after 30 min, 1 h and 2 h of plateau.

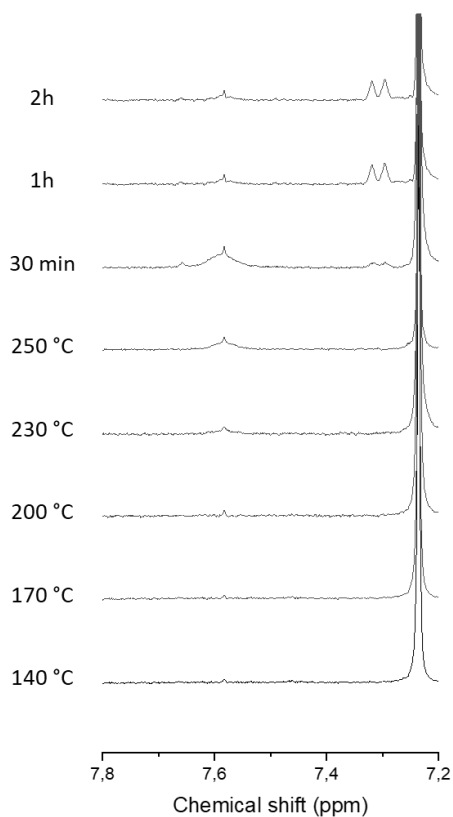

Figure S9c: Zoom of  $^1\text{H}$  NMR spectra in the H of secondary aldimine from synthesis **B** *in situ* study. From bottom to top are displayed spectrum made from samples taken at 140 °C, 170 °C, 200 °C, 230 °C, 250 °C and after 30 min, 1 h and 2 h of plateau.

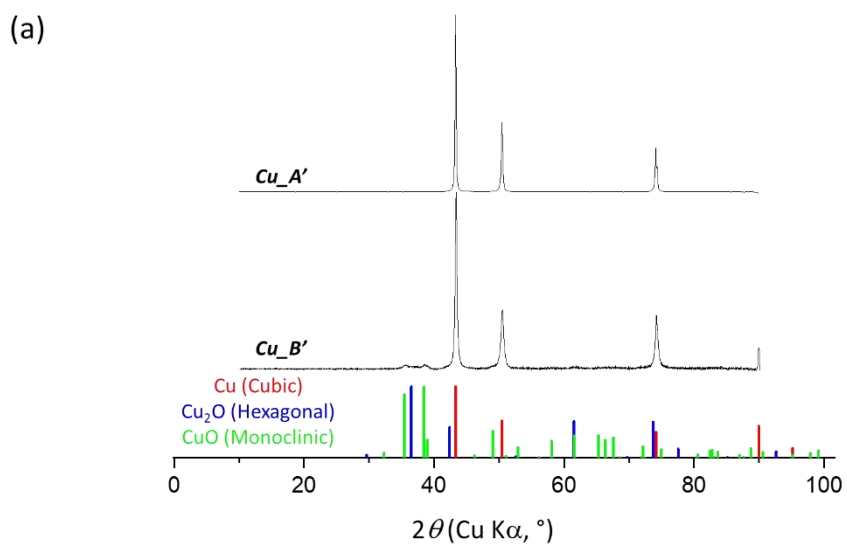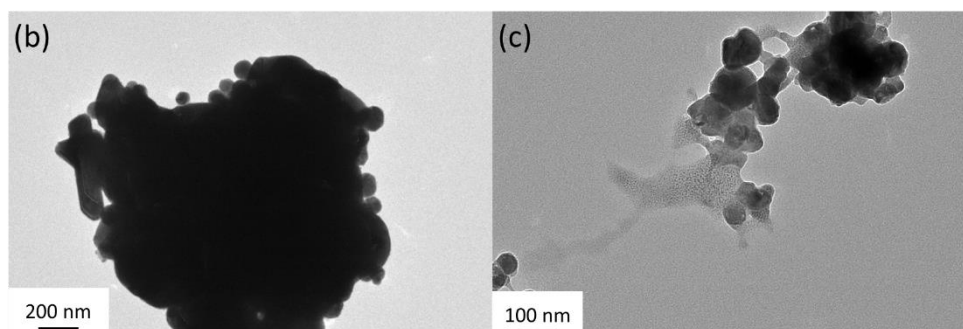

Figure S10 : (a) XRD pattern of **Cu<sub>A'</sub>** and **Cu<sub>B'</sub>**. XRD reference pattern for cubic Cu in red (COD number: 9008468) for cubic Cu<sub>2</sub>O in blue (COD number: 1010941) and for monoclinic CuO in green (COD number : 9015822).TEM micrograph of nanoparticles obtained from (b) synthesis **A'** and (c) synthesis **B'**.

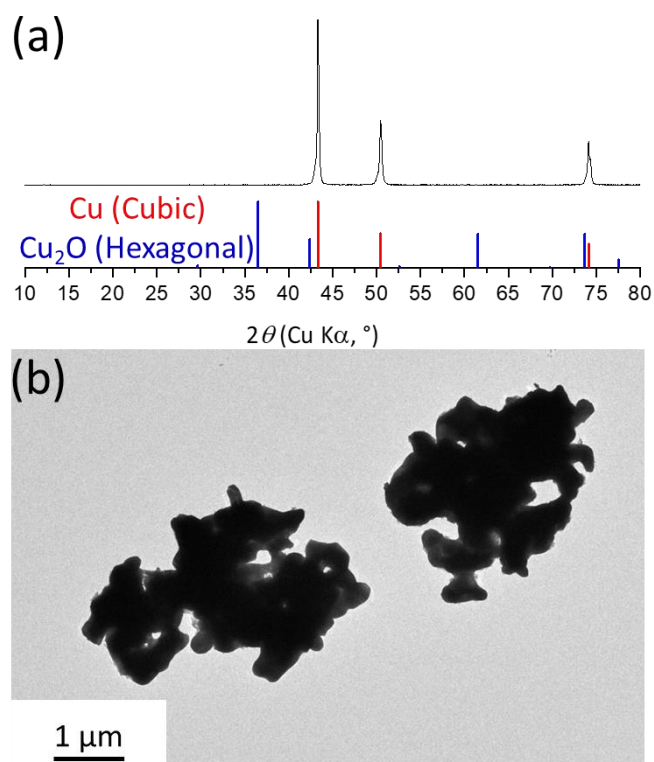

Figure S11: XRD pattern of copper nanoparticles **Cu\_A** synthesized with the modified synthesis **A** to remove water from the reaction medium. XRD reference pattern for cubic Cu in red (COD number: 9008468) and for cubic Cu<sub>2</sub>O in blue (COD number: 1010941), (b) TEM micrograph of the nanoparticles.

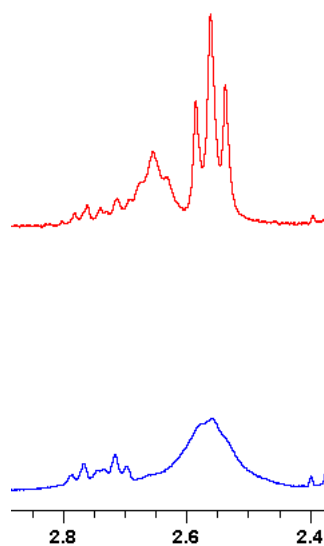

Figure S12: NMR <sup>1</sup>H spectra of the supernatant of synthesis **B**: (a) before centrifugation, (b) after centrifugation at 9000 RPM for 15 minutes.

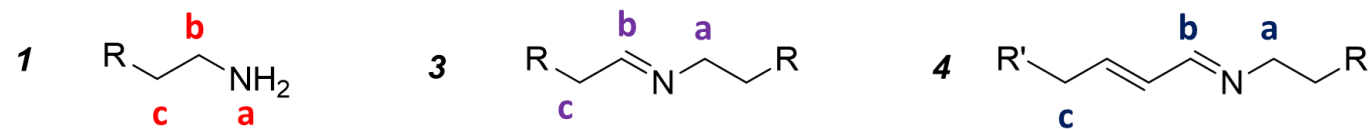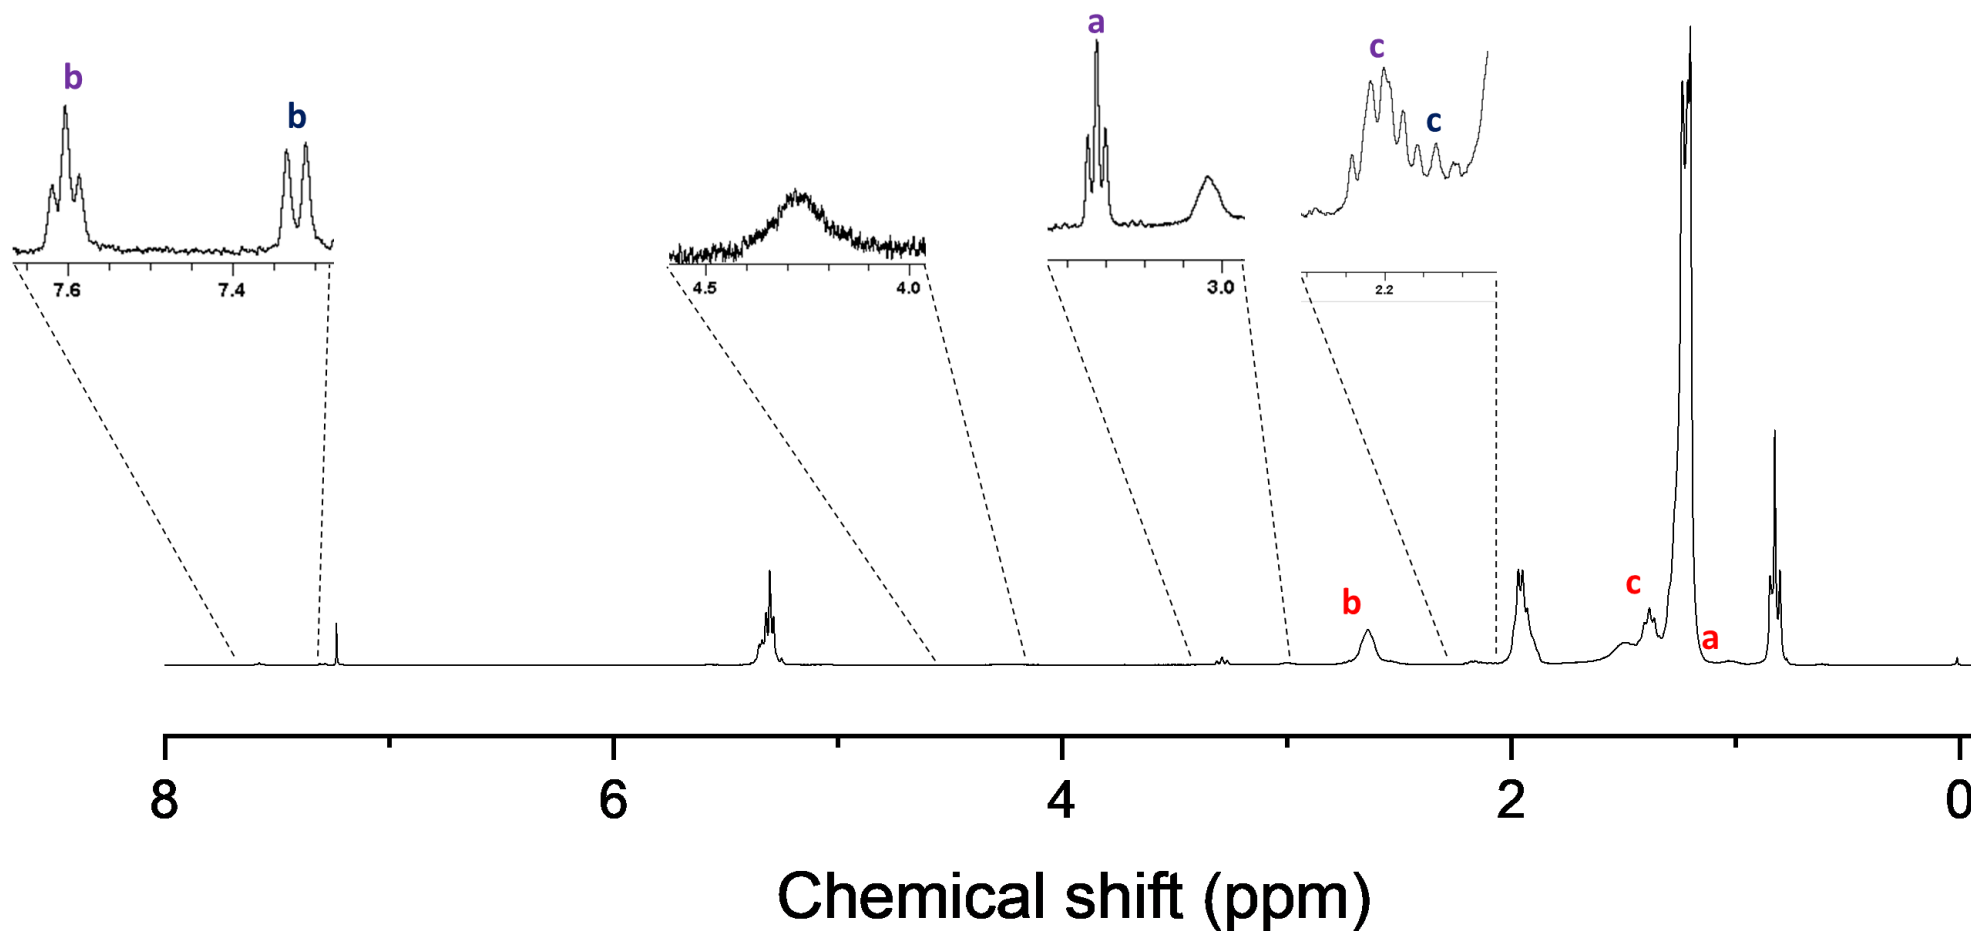

Figure S13: (Top) Molecular structure of species detected in the <sup>1</sup>H NMR spectrum. (Bottom) <sup>1</sup>H NMR of *Cu\_A* catalysed transformation of oleylamine reaction crude centrifuged at 9000 RPM during 15 min.

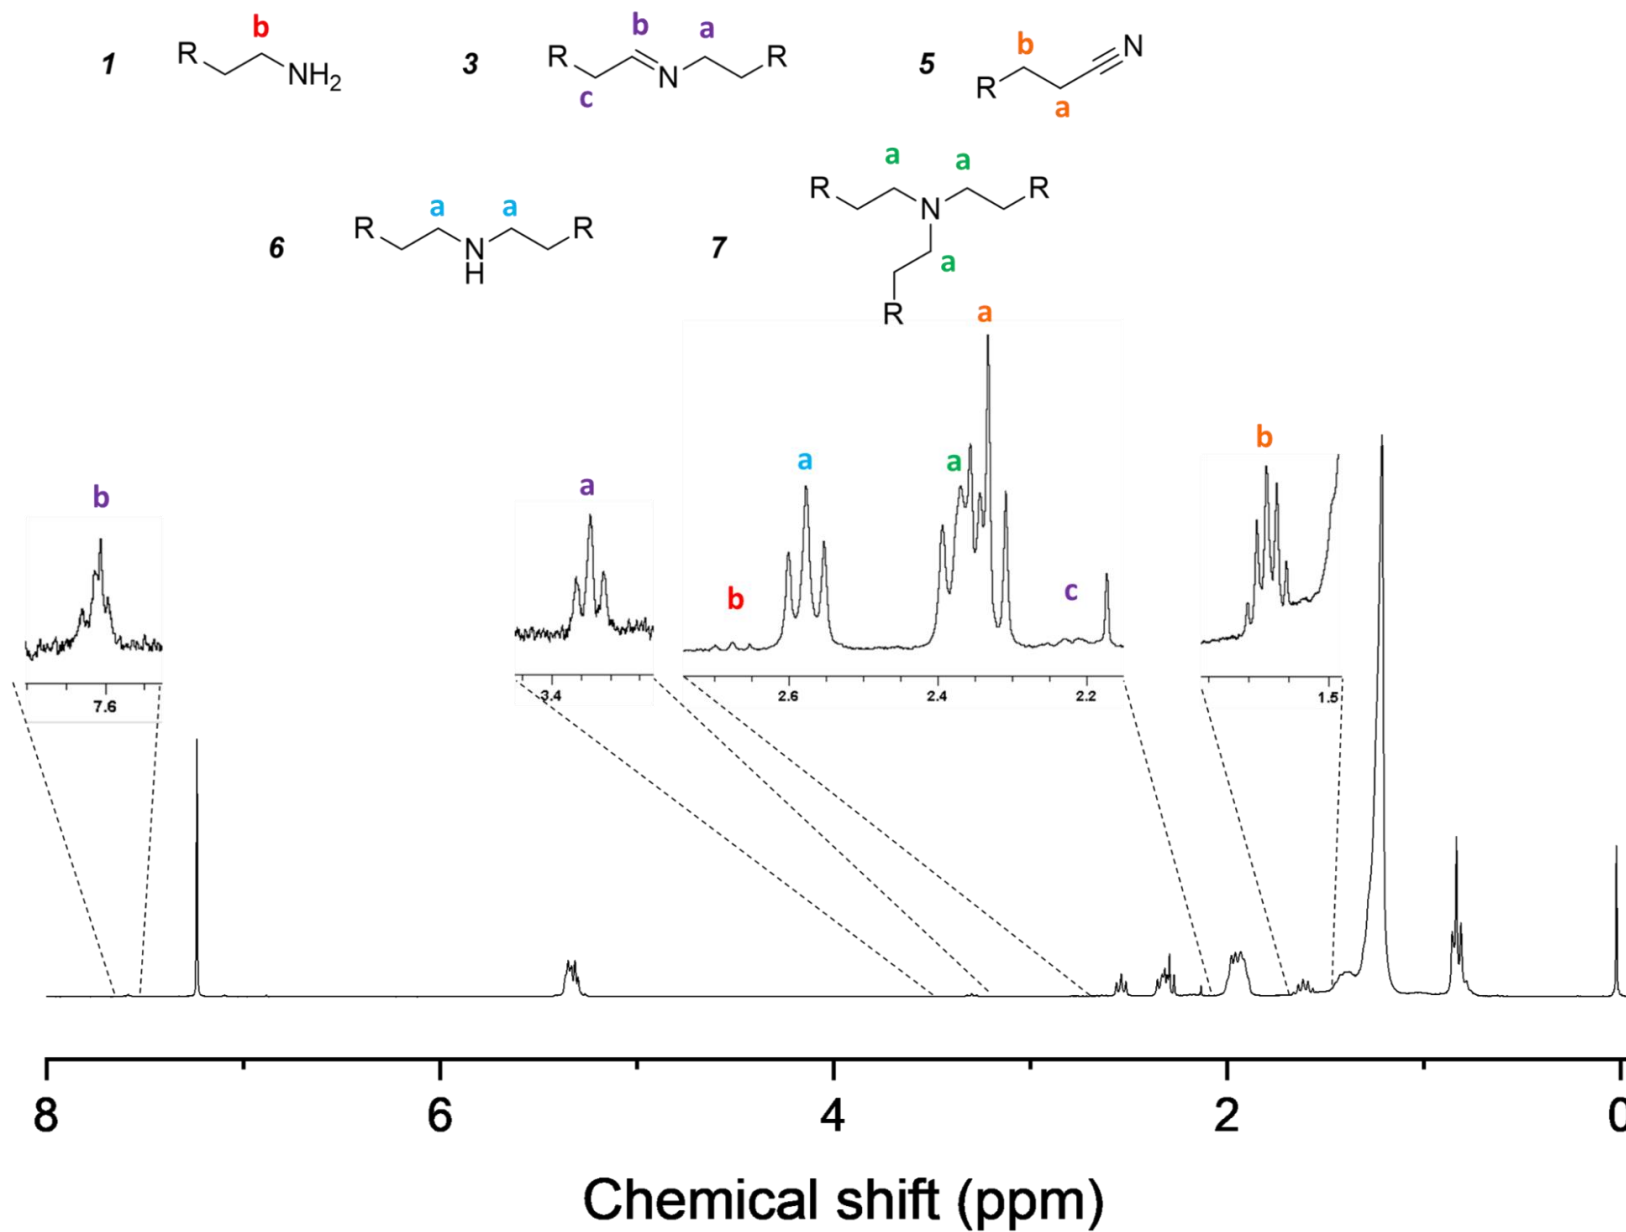

Figure S14: (Top) Molecular structure of species detected in the  $^1\text{H}$  NMR spectrum. (Bottom)  $^1\text{H}$  NMR of **Cu\_B** catalysed transformation of oleylamine reaction crude centrifuged at 9000 RPM during 15 min.

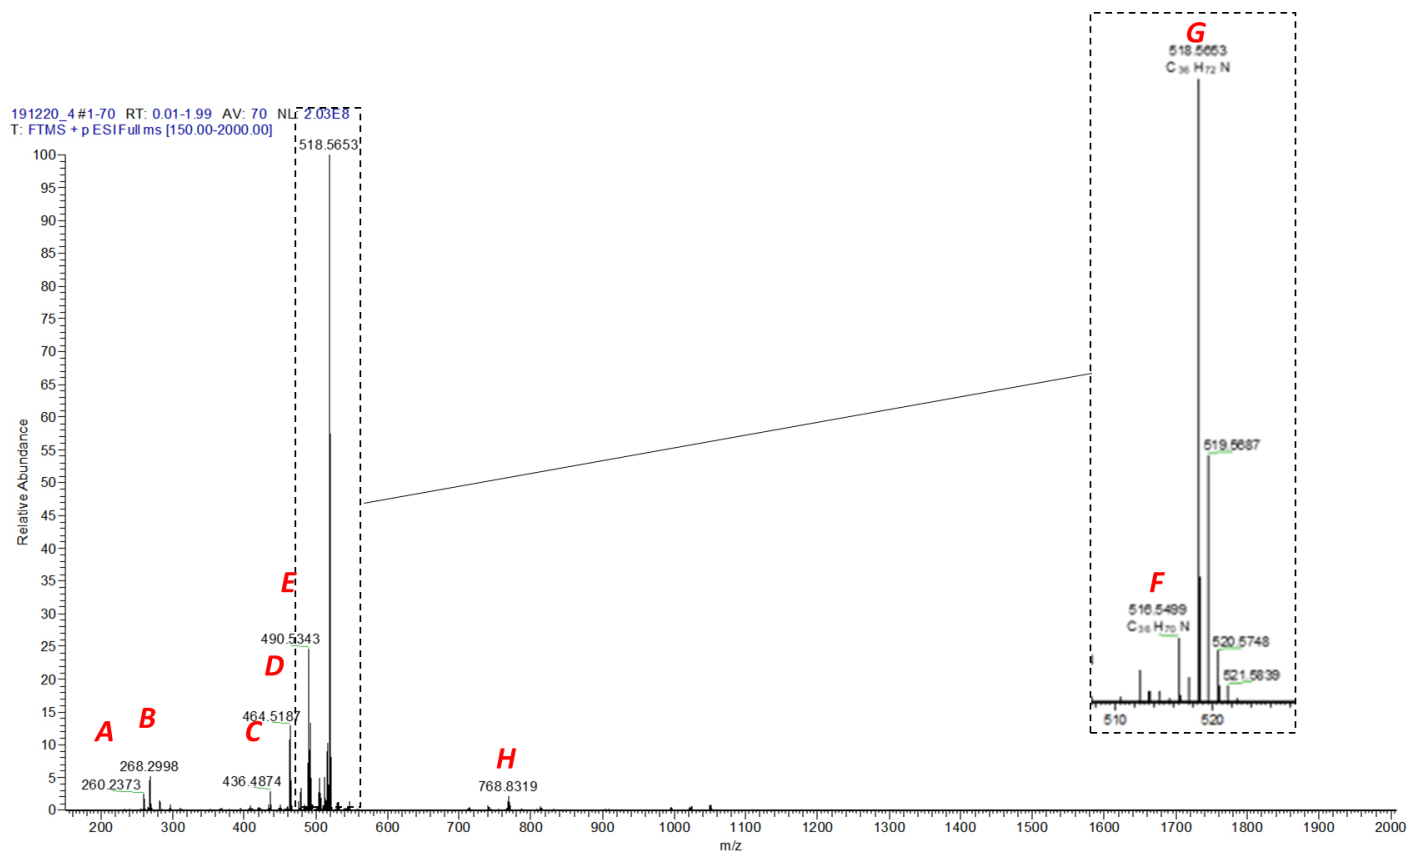

Figure S15: ESI-MS of **Cu<sub>2</sub>B** catalysed transformation of oleylamine reaction crude centrifuged at 9000 RPM during 15 min. Peaks interpreted are marked with a red letter and their interpretation are given in Table S3.

| Entry | Measured Mass | Proposed chemical formula                           | Corresponding theoretical mass | Proposed ionized structure              |
|-------|---------------|-----------------------------------------------------|--------------------------------|-----------------------------------------|
| A     | 260,2373      | C <sub>18</sub> H <sub>29</sub> N + H <sup>+</sup>  | 260,2378                       | Dehydrogenated derivative of oleylamine |
| B     | 268.2998      | C <sub>18</sub> H <sub>37</sub> N + H <sup>+</sup>  | 268.3004                       |                                         |
| C     | 436.4874      | C <sub>30</sub> H <sub>61</sub> N + H <sup>+</sup>  | 436,4882                       |                                         |
| D     | 464.5187      | C <sub>32</sub> H <sub>65</sub> N + H <sup>+</sup>  | 463,5117                       |                                         |
| E     | 490.5343      | C <sub>34</sub> H <sub>67</sub> N + H <sup>+</sup>  | 490,5351                       |                                         |
| F     | 518.5653      | C <sub>36</sub> H <sub>71</sub> N + H <sup>+</sup>  | 518,5659                       |                                         |
| G     | 768.8319      | C <sub>54</sub> H <sub>105</sub> N + H <sup>+</sup> | 768,8325                       |                                         |

Table S3 : Ionized structure interpreted from mass spectrogram S16.



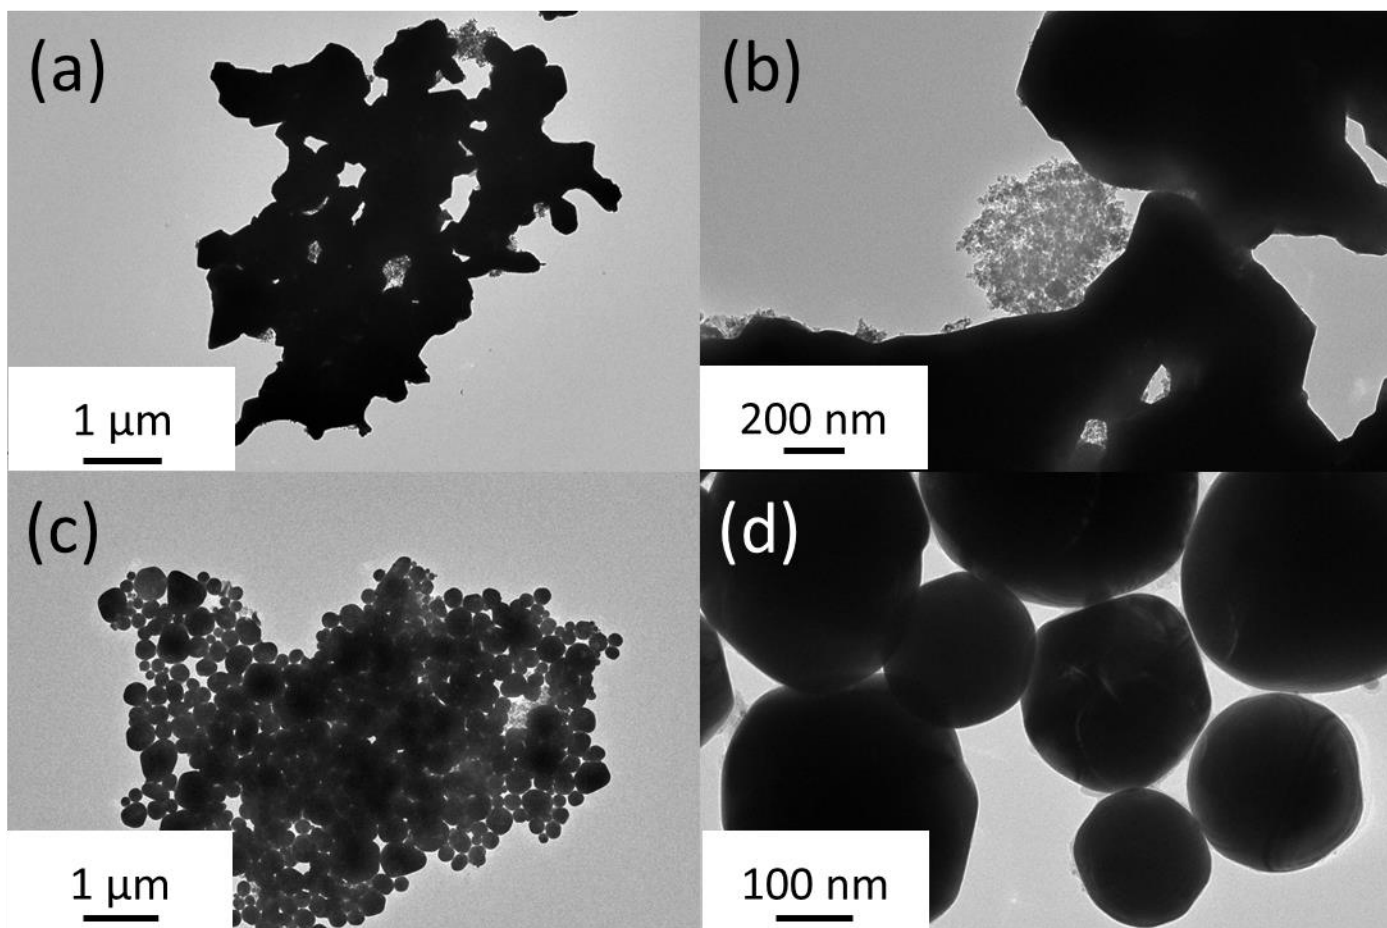

Figure S16 : TEM micrograph of (a),(b) **Cu<sub>A</sub>** and (c),(d) **Cu<sub>B</sub>** after catalytic transformation of oleylamine.

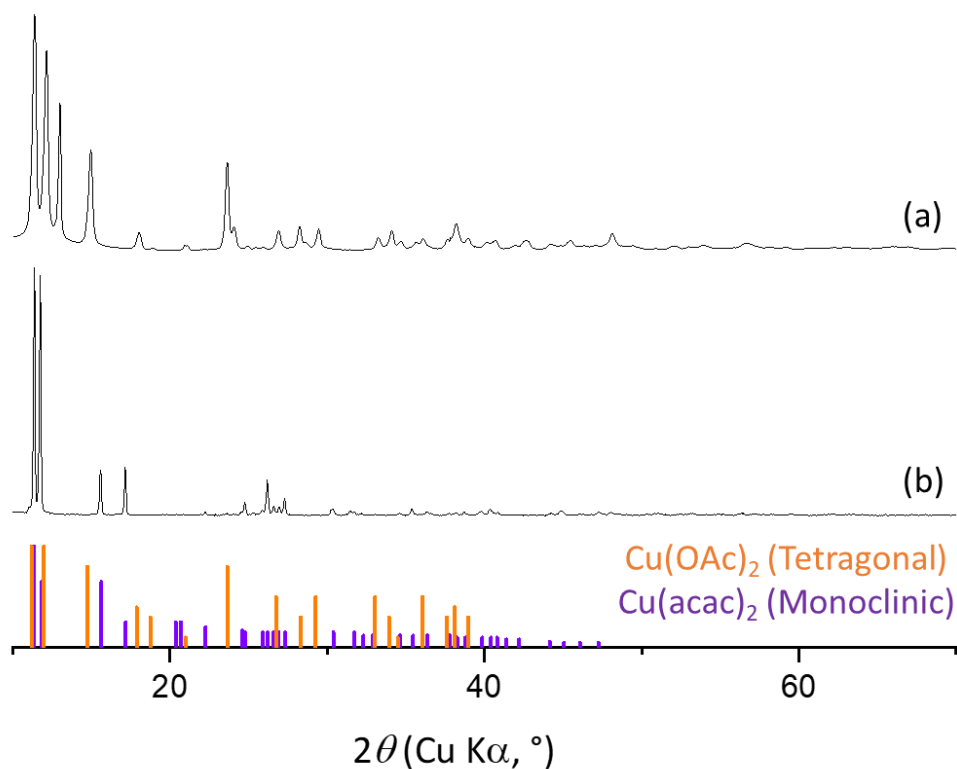

Figure S17: XRD patterns of commercial (a)  $\text{Cu}(\text{OAc})_2$  and (b)  $\text{Cu}(\text{acac})_2$  as precursor. XRD reference pattern for  $\text{Cu}(\text{OAc})_2$  in orange (PDF 00-011-0800) and for  $\text{Cu}(\text{acac})_2$  in purple (PDF 00-011-0800) (bottom).

| Element | $\text{Cu}(\text{OAc})_2$ | $\text{Cu}(\text{acac})_2$ |
|---------|---------------------------|----------------------------|
| Cu      | 98                        | 96.5                       |
| Ni      | 0                         | 2                          |
| Al      | 1.5                       | 1                          |
| Si      | 0.5                       | 0                          |

Table S4: Elemental analysis of commercial  $\text{Cu}(\text{OAc})_2$  and  $\text{Cu}(\text{acac})_2$  performed by energy dispersive X-ray spectroscopy. Carbon and oxygen were not quantified. The data correspond to molar ratio of Cu, Ni, Al and Si in each compound.
